# Supplementary material for: Impact of an online-guided physical activity intervention on cognition, resting-state brain connectivity, and the gut microbiome in healthy older adults - A randomized controlled trial
Source: Research Square preprint supplement (doi:10.21203/rs.3.rs-7039036/v1), 2025-08-05
Supplement: Supplementary file 1 [file 2e9bad66b86682223c191d4c.docx]

**Supplementary Materials**

**Supplementary Table 1 – Exclusion Criteria**

**Table 1. Exclusion criteria for participants**

| 1. Relevant, uncorrected vision disorder |  |
| --- | --- |
| 2. Evidence of cognitive impairment (ACE-III score of ≤ 86) |  |
| 3. Relevant psychiatric or neurological pre-existing condition (e.g., major depression, focal damage of the brain due to operation or stroke, epilepsy) |  |
| 4. Contraindications for MRI (e.g., cardiac pacemaker, non-removable metal parts in/at the body, claustrophobia; excluded from gut-microbiome analyses only; included in remaining analyses) |  |
| 5. Permanent medication with sedating substances |  |
| 6. Loss of capacity of consent |  |
| 7. Relevant, physical impairment |  |
| 8. Stadium 3 and 4 cardiac diseases |  |
| 9. Relevant systemic disease: cancer, severe kidney or liver disease, type 1 or 2 diabetes, diseases with intrinsic inflammation |  |
| 10. Treatments that influence glucose or microbiome composition: antidiabetics, antibiotics, immune suppressants, etc. (excluded from gut-microbiome analyses only; included in remaining analyses) |  |
| 11. Chronic obstipation or diarrhea |  |
| 12. Symptoms of clinical infection during the last month |  |
| 13. Excessive alcohol/drug consumption |  |
| 14. Severe eating disorder |  |
| 15. Known disruption of iron balance |  |
| 16. Chronic treatment with steroidal anti-inflammatory drugs |  |
| 17. Treatment with proton pump inhibitors |  |

**Supplementary Material 1 - Fitting of the whole report task**

Fitting of whole-report accuracy in the different experimental conditions yields the parameters visual processing speed *C* (in number of items/s), visual threshold *t0* (minimum effective exposure duration in ms), and visual short-term memory *K* (vSTM; in number of elements). Detailed underlying estimation algorithms were described by Kyllingsbaek (2006). According to this model, visual objects are processed in parallel and compete for selection based on processing speed – objects processed the fastest are encoded first until the vSTM reaches its capacity. Once encoded, an object becomes consciously accessible and can be reported. The likelihood of an object being selected is determined by (a) its processing rate *v*, and (b) the vSTM storage capacity *K*. The processing rate depends on the dynamics of the processing system, with selection probability increasing exponentially as exposure duration increases.

Mathematically, TVA models the dynamics of the processing systems by three parameters. The first the parameter visual threshold *t0*, representing the minimum exposure duration, below which no visual processing occurs. The second is processing capacity *C*, a speed parameter which refers to the overall rate of information uptake in objects per second, defined as the total processing rate *v* across all objects in the field. The third and mathematically independent parameter is vSTM storage capacity *K*, indicating how many objects can be held in parallel. Objects compete for processing based on their *v* values, with the first *K* objects entering vSTM while the rest are lost and unavailable for reporting.

In the computational framework of TVA, the two basic attentional parameters can be derived from a participant’s performance in a whole-report task. In this task, participants are briefly presented letter arrays, and their ability to report multiple letters is measured as a function of array exposure duration. Identification probability is modelled by an exponential growth function, in which the origin represents the visual threshold *t0*,the growth parameter corresponds to processing speed *C*, and the asymptote indicates the maximum number of objects that can be stored in parallel (storage capacity *K*).

**Supplementary Material 2 - TVA whole report assessment**

This task is computer-based and was conducted in a dimly lit room. To account for visual limitations, all participants first completed the MARS contrast sensitivity test, with no one falling below the cut-off value for their age group.

In the TVA-based whole-report task, stimuli were blue or red capital letters (0.88° wide × 1.06° high, or 1.0 cm wide × 1.2 cm high, each), randomly chosen from the set {A, B, C, D, E, F, G, H, J, K, L, M, N, O, P, R, S, T, U, V, W, X, Z}, and shown on a black background, with colors matched by luminosity. Stimuli were presented on an ASUS 24-inch monitor, 1980 × 1080 pixel screen resolution, and 100-Hz refresh rate. The approximate distance of the subjects to the monitor was 60cm, which was controlled by the use of a chin rest. The test took place in a dimly lit room with the experimenter sitting behind the participant and lasted approximately 40 minutes. Participants had to verbally report as many letters as they could recognize from a display that briefly presented six letters in an imaginary circle (5.64° or 6.4-cm radius). Participants were asked to fixate on the point (0.79° × 0.79° or 0.9 cm × 0.9 cm) at the center of the display at all times. After an 800-ms fixation period, letters were shown in either blue or red in a single trial. Participants did four blocks of 12 trials each to practice the task. Based on these blocks, an individual minimum exposure duration (ED) was determined for each participant. Four additional higher ED values were obtained from a set predefined in the task, based on the individual minimum ED. The task included 336 trials, presented in four blocks of 84 trials each. The letters were displayed either with or without a mask (240 trials masked, 96 unmasked). In unmasked conditions, ‘iconic’ memory allows the letters to be encoded for a few hundred milliseconds longer (Sperling, 1960). Pattern masks disrupt this memory effect. In half of the trials, an auditory cue (80 dB tone, either with a frequency of 500 Hz or 900 Hz) was administered through a loudspeaker 200 ms before letter onset. We used a TVA paradigm including auditory cues, as this is the version regularly used in studies of patients with mild cognitive impairment to study phasic alerting effects. We kept this paradigm in our study to allow comparability with those previous studies. We did not analyze cued vs. non-cued trials separately, as this was not of particular interest for our study. To facilitate the task for participants, they verbally reported the letters and the experimenter typed them. No emphasis was placed on the speed or order of the verbal report.

**Supplementary Material 3 - TVA partial report**

Administration of the TVA-based partial report task followed the whole report task. In this task, a (red) single target letter, a target plus a (blue) distractor letter, or two (red) targets appeared at the corners of an imaginary square located 7.5 cm around the fixation point on a black screen (0.88° wide × 1.06° high, or 1.0 cm wide × 1.2 cm high, each). All stimuli were masked and there were no auditory cues. Participants had to report the target letter while ignoring distractors. This task started with a pretest phase (2 blocks of 24 trials each) in which the individual exposure duration was determined and which was followed by six test blocks with 48 trials each (i.e., 288 trials in total). The partial report task allowed the estimation of the attentional-selectivity parameter top-down control *α* (i.e., attentional weight allocated to distractors compared to that allocated to targets: *w*distractors/*w*targets). The task lasted 30min on average.

**Supplementary Table 2 - MRI specifications**

**Table 2. Acquisition parameters of fMRI**

| MP-RAGE T1 sequence parameters | Resting-state fMRI sequence parameters |
| --- | --- |
| Repetition time (TR) 2300ms  Echo time (TE) 2.07ms  Flip angle (FA) alpha 9°  Voxel size 1x1x1mm3  In-plane field of view (FOV) 256mm  Number of (contiguous axial) slices 192  Acquisition time 5:21min | Repetition time (TR) 1950ms  Echo time (TE) 33.60ms  Flip angle (FA) 90ms  Voxel size 1.4x1.4x1.4mm3  In-plane field of view (FOV) 256mm  Number of slices 100  Acquisition time 9:28min  Multiband acceleration factor 4 |

**Supplementary Table 3 - Baseline characteristics of the MRI sub-sample**

**Table 4. Baseline characteristics of 69 brain imaging participants by group**

|  | Total  (N = 69) | Physical activity intervention group  (n = 36) | Active control group  (n = 33) | p1 |
| --- | --- | --- | --- | --- |
| Age, mean (SD), y | 66.25 (3.62) | 66.08 (3.30) | 66.42 (3.99) | .70 |
| Female gender, No. (%) | 46 (66.7%) | 24 (66.7%) | 22 (66.7%) | 1.00 |
| Education, mean (SD), y | 16.43 (2.55) | 16.72 (2.50) | 16.12 (2.61) | .33 |
| ACE-III, score, mean (SD) | 94.30 (2.66) | 94.42 (2.60) | 94.18 (2.76) | .72 |

There were no differences between participants with and without an MRI assessment (all *p* > .217).

**Supplementary Table 4 – Resting-state Functional Networks**

**Table 4. Resting-state Functional Networks (Yeo 17N; Yeo et al., 2011) with Spatial Cortical Classification following Brodmann (Garey, 2006).**

| Domain | Yeo 17N | Brodmann-Area1 |
| --- | --- | --- |
| Visual | Visual 1 (VIS 1)  Visual 2 (VIS 2) | 18, 19  17 |
| Attention | Dorsal attention network 1 (DAN1)  Dorsal attention network 2 (DAN2)  Including FEF and IPS | 6, 7  37, 39 |
| Salience | Ventral attention network 1 (VAN1)  Partly including DLPFC | 13, 24, 32, 39, 40 |
| Control | Frontoparietal network 1 (FP1)  Frontoparietal network 2 (FP2)  Frontoparietal network 3 (FP3)  Frontoparietal network 4 (FP4)  Including DLPFC (BA8, 9, 46) | 9, 10, 24, 32  8, 9, 10, 11, 21, 32, 46  40, 44, 45, 46  8, 9, 44, 46 |

FEF = frontal eye field, IPS = intraparietal sulcus, DLPFC = dorsolateral prefrontal cortex. 1Overlap of Brodmann-Areas between networks since different areas share functions, and all areas show multiple domains of activity.

**Supplementary Material 4 – Extraction and analyses of the stool samples**

*DNA extraction from stool samples*

DNA was isolated from fecal material at the Competence Centre for Genomic Analysis (Kiel, Germany) using the QIAamp DNA fast stool mini kit automated on the QIAcube (Qiagen, Hilden, Germany) as previously described in [63]. Amplification of the V3-V4 hypervariable region of the bacterial 16S rRNA gene was performed via one‐step polymerase chain reaction (PCR) using barcoded primers. Primers 341F (ACT CCT ACG GGA GGC AGC AG) and 806R (GGA CTA CHV GGG TWT CTA AT) were used for the amplification of the V3V4 region. A no‐template control and a MOCK community DNA standard (Zymo Research Europe GmbH) with predetermined bacterial species were included. The reactions were performed using a mixture (15 µl) containing 0.15 µl Phusion Hot Start II Polymerase (2 U/µl) with 3 µl reaction buffer (Thermo Fisher Scientific), 10 mM dNTP mix, 10 µM of each primer, 8.95 µl H2O (Invitrogen, Thermo Fisher Scientific), and 2 µl of template DNA. Amplification steps consisted of the following: an initial denaturing step of 98°C for 3 min, which was followed by 30 cycles of 98°C for 9 s, 50°C for 1 min, 72°C for 1 min, and an elongation step for 72°C for 10 min. PCR products were then purified and normalized with the SequalPrep Normalization Plate kit (Thermo Fisher Scientific) according to the manufacturer's guidelines. Final equimolar libraries were sequenced using the paired‐end MiSeq reagent kit v3 (2 × 300 bp) on the MiSeq platform (Illumina Inc.).

*Bioinformatic processing of raw read data*

Paired end 16S reads were stitched together using FLASH (version 1.2.11) with minimum and maximum sequence overlap of 10 and 300 bp respectively. Quality of the merged reads was filtered for a phred-score ≥ 30 in at least 95% of bases with FASTX toolkit (version 0.0.14). Potential contamination of reads with Illumina’s small RNA 3' adapter (TGG AAT TCT CGG) was removed using cutadapt (version 4.2) with at least 3 bp overlap and at most 10% mismatches, combined with quality-trimming of bases at the 3’ end below a phred-score of 30. Processed reads were aligned against the variable region V3-V4 of the SILVA database (version 132) via Mothur (version 1.48.0). Zero‐radius operational taxonomic units (zOTU) for the full cohort were created by dereplication, clustering with denoising and chimera removal using the vsearch software (version 2.14.2). Processed reads from each sample were matched against those representative zOTUs using the usearch algorithm with global alignment aiming for a sequence identity of at least 97 % as implemented in the vsearch software (version 2.14.2), obtaining sample-wise zOTU abundance profiles. Taxonomic annotation was obtained from alignment of zOTU sequences against the variable region V3-V4 of the SILVA database (version 132) via Mothur (version 1.48.0). Microbiome samples were excluded from analysis if the donors fulfilled any of the following criteria shortly before stool sampling: use of antibiotics, travel to another continent, contracted an infectious disease, had colonoscopy or known diagnosis of inflammatory bowel disease. Additionally one pair of samples could no longer be discerned between baseline- and post-intervention, leaving us with a total of 167 samples from 87 donors. In order to control for environmental factors potentially impacting microbiome composition, an additional metadata parameter was introduced in the downstream analysis accounting for the season of the year in which the stool sample was collected (Spring: March – May, Summer: June – August, Autumn: September – November, Winter: December – February).
Taxonomic assignment of the zOTUs to genus level was based on sequence similarity >= 94.5, while zOTUs below that threshold were either assigned to their taxonomic family, in case of a sequence similarity >= 86.5 (e.g. “f__Bacteroidacea|g__unknown”), or else summed under “unknown_genus”. All statistical analysis of microbiome composition were then performed on this combined “family|genus” taxonomic level in R (version 4.3.3). Features with near zero variance were removed from the resulting count matrix with function nearZeroVar from R-package caret (version 6.0.94).

*Taxonomic analysis of microbiome profiles*

Taxonomic count data was normalized by sample in order to obtain relative abundances. We then investigated the potential relationship of each different cognitive measure with the abundance of each genus via linear modeling. Therefore, for each genus ‘g’ and each cognitive parameter ‘c’ we built a linear model with the cognitive measure post-intervention as dependent variable, while controlling for the same cognitive measure baseline-intervention as well as for gender, age, and IQ at baseline and genus abundance (e.g. “c_post ~ c_pre + gender + age + IQ + g”). Across all linear models, the p-values for the independent variable genus were collated and adjusted for multiple testing via the Benjamini-Hochberg method.

In an independent analysis we checked for differentially abundant taxa between treatment groups and time points with the R-package ANCOMBC (version 2.4.0). Un-normalized counts were used with the function ancombc2 and the following parameters: fix_formula = "TpTr + gender + season", rand_formula = "(1|ParticipantID)", pairwise = TRUE, group = "TpTr", where TpTr is a combined factor variable of treatment group and time point.

*Ecological diversity indices*

Alpha- and beta-diversity indices were calculated based on genus-level abundances via the R-package phyloseq (version 1.46.0). For both diversity indices un-normalized genus counts were randomly sub-sampled to a common read coverage of 3281 reads per sample via the rraefy function. Random sampling was repeated 500 times and then the average abundance was used for calculation of the Shannon index alpha-diversity (function diversity) and the Bray-Curtis dissimilarity index (function vegdist) for beta-diversity.

**References**

Garey, L. J. (Ed.). (1999). *Brodmann's' localisation in the cerebral cortex'*. World Scientific.

Sperling, G. (1960). The information available in brief visual presentations. *Psychol. Monogr*. *Gen. Appl*. 74, 1–29.

Yeo, B. T., Krienen, F. M., Sepulcre, J., Sabuncu, M. R., Lashkari, D., Hollinshead, M., ... & Buckner, R. L. (2011). The organization of the human cerebral cortex estimated by intrinsic functional connectivity. *Journal of neurophysiology*.
